# Supplementary material for: Spatial and temporal genetic homogeneity of the Monterey Spanish mackerel,Scomberomorus concolor, in the Gulf of California
Source: PeerJ journal article supplement (doi:10.7717/peerj.2583), 2016-10-25
Supplement: Supplemental_Figure_F1.pdf [file Supplemental_Figure_F1.pdf]

Mean posterior probability (LnP(D)) values from  $k=1$  to  $k=7$  from the STRUCTURE analysis. The most probable number of genetic populations is  $k=1$  with **(A)** or without admixture model **(B)**.

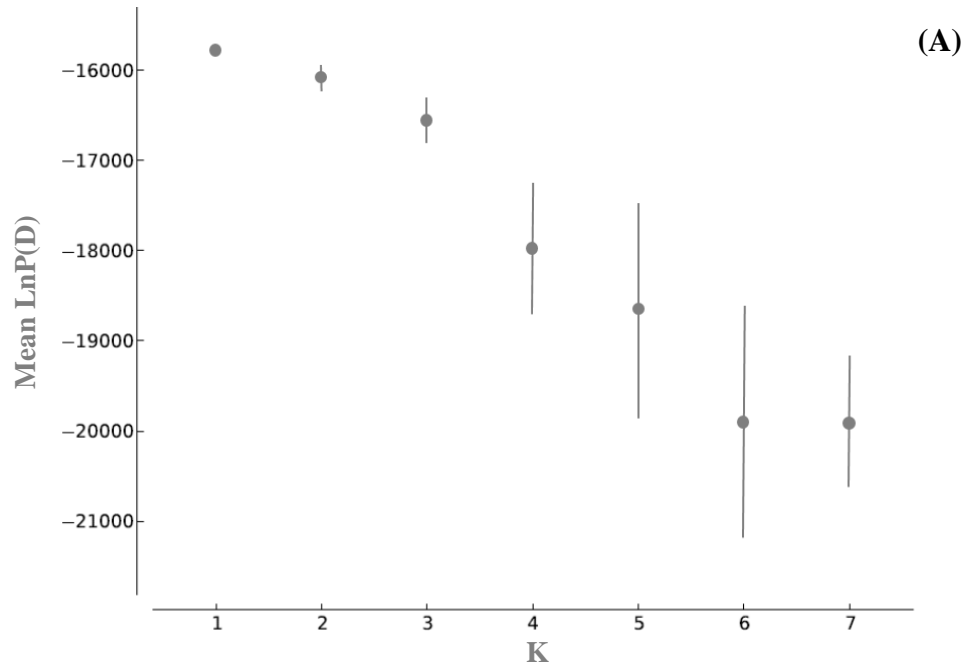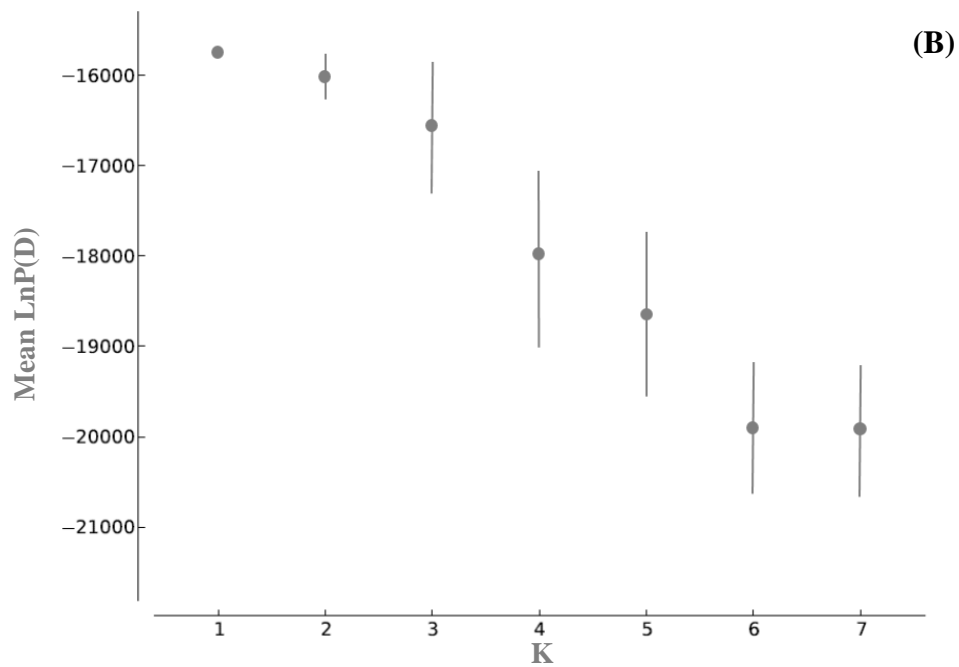

Mean LnP(D) values are represented by circles and bars represent the standard deviation (s.d.).
